# Supplementary material for: Top-down fabrication of fluorine-doped tin oxide nanopillar substrates for solar water splitting
Source: Royal Society of Chemistry journal article supplement (doi:10.1039/c7ra02937c), 2017-01-01
Supplement: c7ra02937c1.pdf [file c7ra02937c1.pdf]

## Supporting Information

### **Top-down Fabrication of Fluorine-doped Tin Oxide Nanopillar Substrates for Solar Water Splitting**

Maureen H. Tang<sup>†1</sup>, Pongkarn Chakthranont<sup>†2</sup>, and Thomas F. Jaramillo<sup>2</sup>

#### **Nanosphere lithography**

**Table S1.** Optimized compositions of polystyrene nanosphere solutions for spin-coating process

| Sphere diameter<br>(nm) | Mixture composition ( $\mu\text{L}$ ) |       |            |
|-------------------------|---------------------------------------|-------|------------|
|                         | 10 wt%<br>Nanosphere                  | Water | Surfactant |
| 500                     | 280                                   | 420   | 100        |
| 260                     | 200                                   | 550   | 100        |

## ALD of WO<sub>3</sub> Photoabsorber

Figure S2a shows that the growth rate depends on the BTBMW pulse time and that the dependence can be fitted by a Langmuir surface adsorption model. A BTBMW pulse time of 2 s was chosen to ensure high coverage of the W precursor on the substrate surface.

Figure S2b verifies that the film thickness increases linearly with deposition cycles.

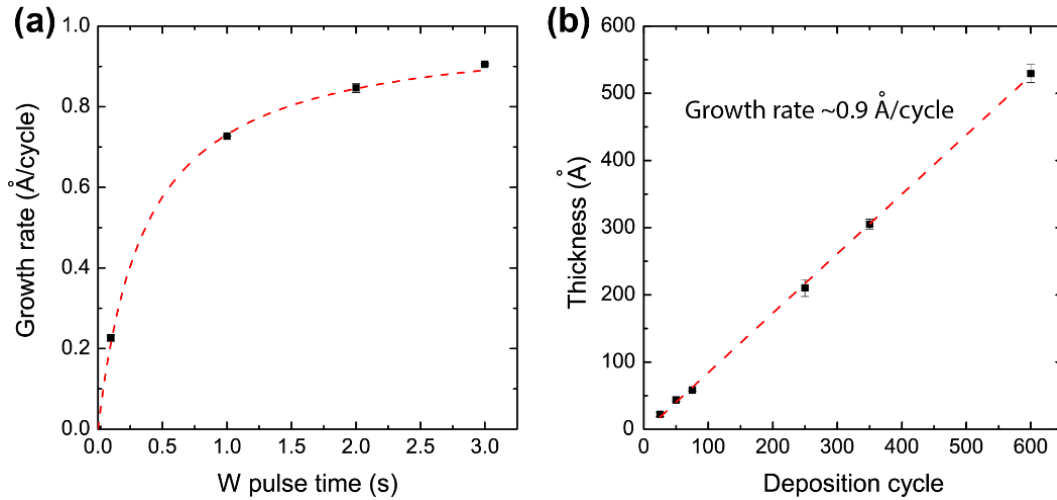

**Figure S1.** Saturation curve and linear growth rate of ALD WO<sub>3</sub> on Si substrate. (a) Growth rate of WO<sub>3</sub> as a function of BTBMW pulse time with a constant pulse of O<sub>2</sub> plasma counter reactant (20 s at 300 W) shows a saturation when BTBMW > 2 s. (b) With 2 s BTBMW and 20 s O<sub>2</sub> plasma, the thickness of WO<sub>3</sub> scales linearly with the number of ALD deposition cycle.
